# Supplementary material for: Human fetal mesenchymal stem cells secretome promotes scarless diabetic wound healing through heat‐shock protein family
Source: PubMed Central journal article supplement (PMC9842061; doi:10.1002/btm2.10354), 2022-06-21
Supplement: BTM2-8-e10354-s001.pdf [file BTM2-8-e10354-s001.pdf]

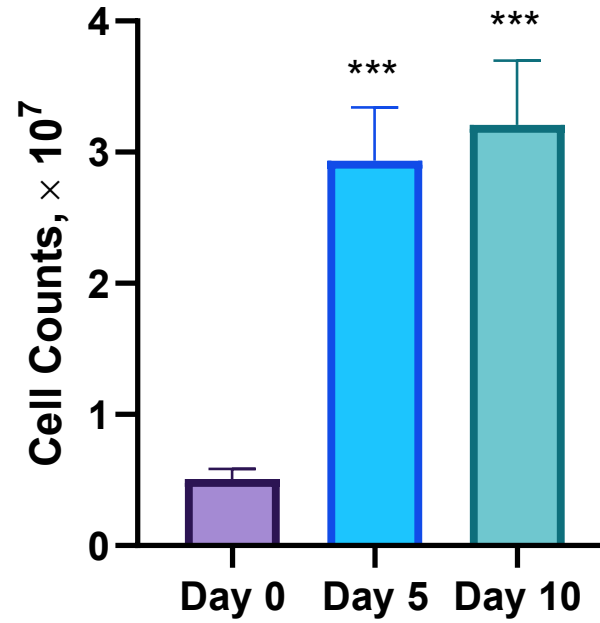

**Figure S1.** Cell viability during 10-day culture of hfMSCs in a PBS bioreactor. Cell viability was determined by cell counting . 5 million cells were expended to 30 million cells during 10 days culture.
